# Supplementary material
Source: PubMed Central journal article supplement (PMC5201446)
Supplement: NIHMS839016-supplement-Supplementary_tables.pdf [file NIHMS839016-supplement-Supplementary_tables.pdf]

Supplementary Table 1. Summary of demographic and environmental data in 63 sampled homes.

| Variable                   | Distribution                                                                                                                      |
|----------------------------|-----------------------------------------------------------------------------------------------------------------------------------|
| Gender                     | 38 boys<br>25 girls                                                                                                               |
| Age (months)               | 25 children 24 to 27 months old<br>22 children 28 to 31 months old<br>16 children 32 to 36 months old                             |
| Ethnicity                  | 45 white; 35 Hispanic/Latino/Latina<br>12 Asian<br>4 Black/African-American<br>1 Pacific Islander/Native Hawaiian<br>1 mixed race |
| Dwelling type              | 29 single-family homes<br>10 detached homes with 2 apts<br>9 rowhouses/townhouses<br>15 apartments                                |
| Floor type in room sampled | 34 rooms with carpet<br>29 rooms with bare floor                                                                                  |
| Season sampled             | 9 winter<br>14 spring<br>17 summer                                                                                                |

|                         |                                                                                             |
|-------------------------|---------------------------------------------------------------------------------------------|
|                         | 23 fall                                                                                     |
| Last time floor cleaned | 35 day of sampling/previous day<br>26 within a week of sampling day<br>2 longer than a week |

Supplementary Table 2. Percentage of sampling period PIPER spent at each speed and breathing zone (Shalat et al., 2011).

| Position/Inlet<br>Height (cm) |           | Lying<br>30 | Crawling<br>40 | Sitting on floor<br>44 | Standing<br>84 |
|-------------------------------|-----------|-------------|----------------|------------------------|----------------|
| Boys                          | 10 cm/sec | 1.7         | 0.2            | 11.8                   | 52.1           |
|                               | 40 cm/sec | 0           | 0.1            | 0.1                    | 32.8           |
|                               | 80 cm/sec | 0           | 0              | 0                      | 1.3            |
|                               |           |             |                |                        |                |
| Girls                         | 10 cm/sec | 2.3         | 0.4            | 11.6                   | 58.7           |
|                               | 40 cm/sec | 0           | 0.5            | 0.1                    | 25.7           |
|                               | 80 cm/sec | 0           | 0              | 0                      | 0.9            |

Supplementary Table 3. Activities of children in the study cohort (n=63). The numbers in column “Expected activities” are based on parents’ answers to questions about their child’s typical activities. The numbers in column “Observed activities” refer to activities as observed by the technicians during the sampling period.

| Activity                            | Expected activities in the room | Observed activities during sampling |
|-------------------------------------|---------------------------------|-------------------------------------|
| <b>Quiet Play</b>                   |                                 |                                     |
| Watch TV                            | 54                              | 41                                  |
| Play a video game                   | 9                               | 2                                   |
| Read a book/color                   | 58                              | 20                                  |
| Play with action figures/cars/dolls | 61                              | 52                                  |
| Build with blocks                   | 46                              | 14                                  |
| <b>Active Play</b>                  |                                 |                                     |
| Run around                          | 62                              | 39                                  |
| Do gymnastics (rolls/cartwheels)    | 31                              | 3                                   |
| Ride on a bike/toy                  | 43                              | 16                                  |
| Roughhouse                          | 47                              | 11                                  |
| Play with a pet                     | 12                              | 1                                   |
| <b>Eat</b>                          |                                 |                                     |
| Eat snacks                          | 53                              | 37                                  |
| Eat meals                           | 26                              | 7                                   |
